# Supplementary material for: miRNAs as Regulators of the Early Local Response to Burn Injuries
Source: MDPI journal article supplement (doi:10.3390/ijms22179209), 2021-08-26
Supplement: s1 [file s1]

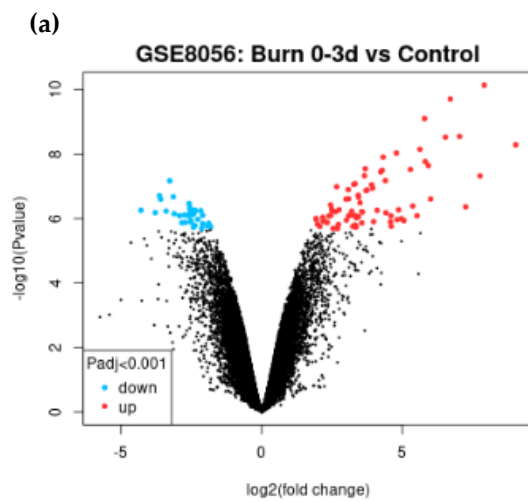

(b)

**GSE8056: limma,  $\text{Padj} < 0.001$**

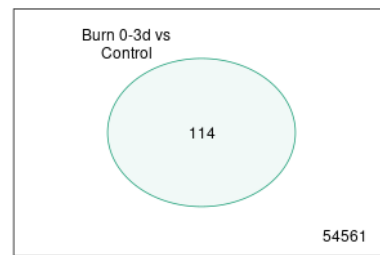

**Figure S1.**

(a) Volcano Plot, (b) Venn diagram

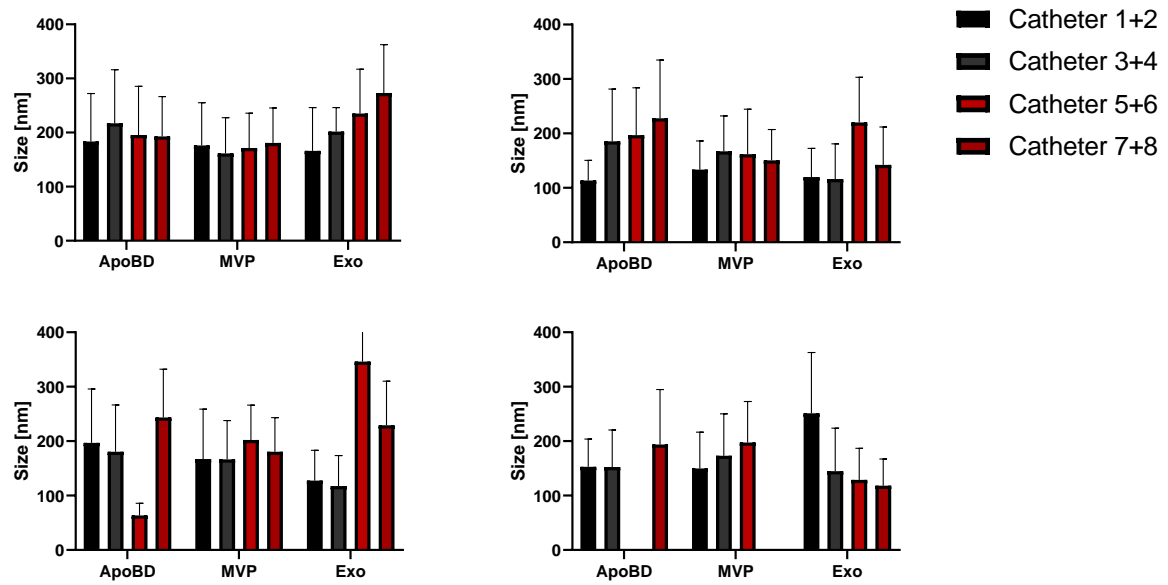

**Figure S2.** Size distribution of particles in dISF of an ex vivo skin model for burn injuries. Single experiments depicted separately.

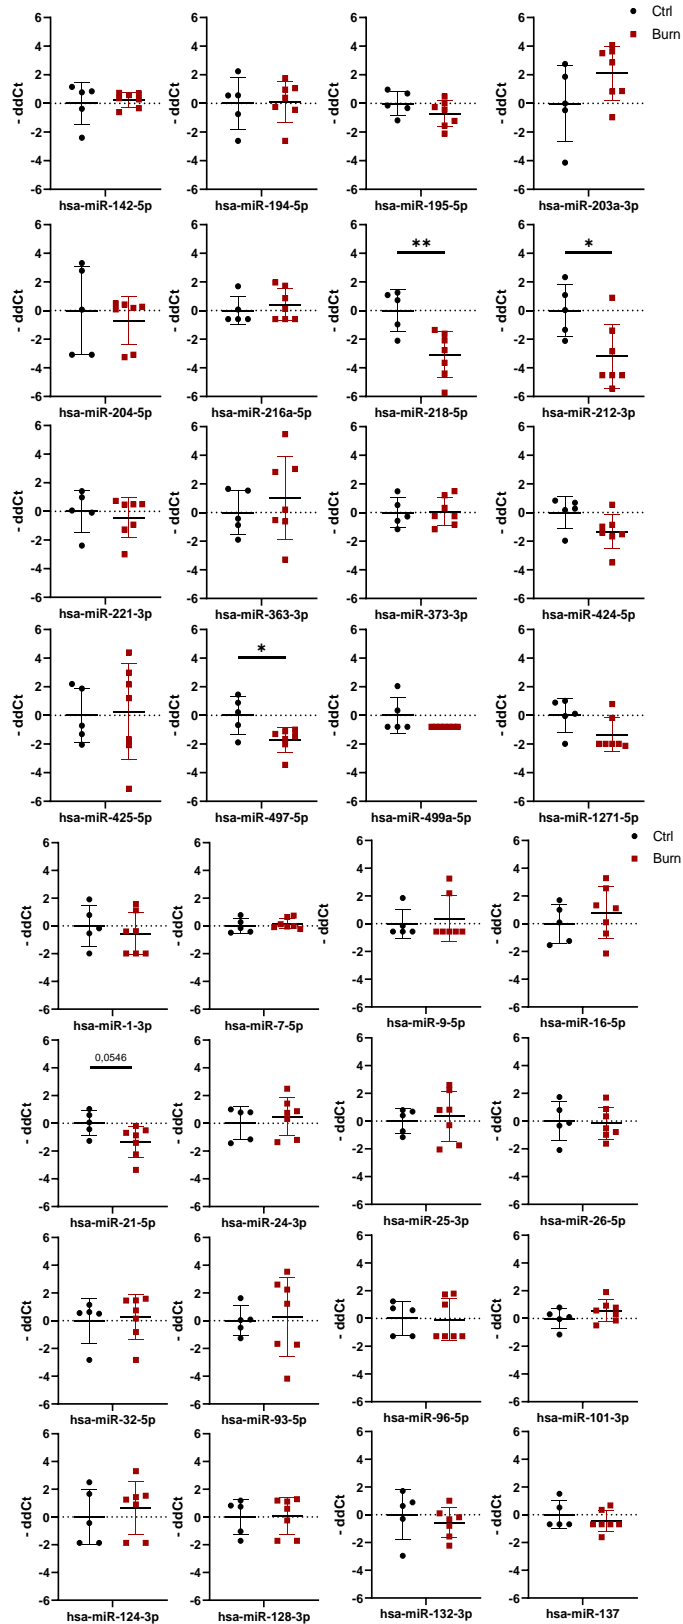

**Figure S3.** Characterization of miRNAs in dISF in an ex vivo human skin model for burn injuries – all analysed miRNAs. Data are derived from 3 independent experiments and presented as individual values of -ddCt, normalized to an interplate calibrator and expressed relative to controls, with means (line) and standard deviation (whiskers). Significance was tested with T-test, p-values <0.05 were considered as statistically significant, with \*, \*\*, \*\*\* indicating p<0.05, p<0.01, p<0.001.

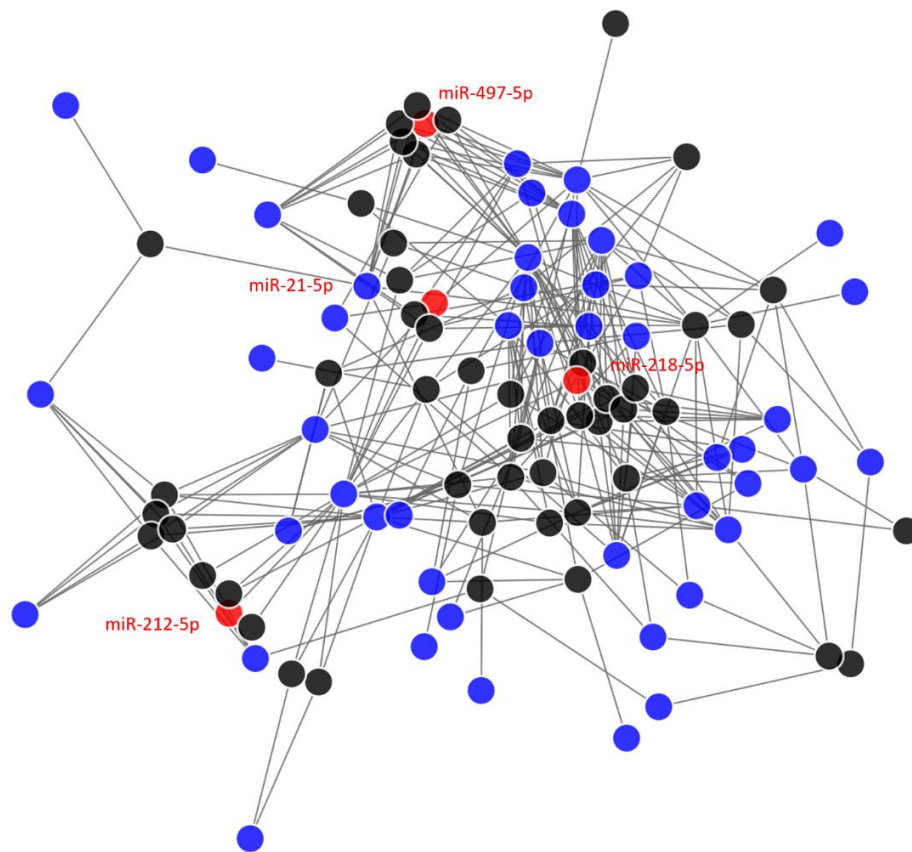

**Figure S4.** Interaction network of miRNAs (black and red) with the selected mRNA target genes (blue). The miRNAs found to be differentially regulated are displayed in red. There is an interactive network available with a mouse-over feature.

**Table S1.** miRNAs with the number of interactions based on 2 different tools that were considered as putative early burn response regulators. miRNAs for analysis have been selected by number of interactions with the 114 selected gene targets. Those miRNAs were selected that 1) preferably were found by 2 methods of screening (TargetScan Human conserved interactions among mammals) and miRWalk miRNA targets.

| <b>MiRNAs putative targeting the 114 gene targets</b> | <b>TargetScan Human N° of targets</b> | <b>Overlapping with miRWalk miRNA Targets</b> |
|-------------------------------------------------------|---------------------------------------|-----------------------------------------------|
| miR-1-3p                                              | 8                                     | 1                                             |
| miR-363-3p                                            | 7                                     | 1                                             |
| miR-124-3p                                            | 6                                     | 1                                             |
| miR-16-5p                                             | 6                                     | 1                                             |
| miR-497-5p                                            | 6                                     | 1                                             |
| miR-21-5p                                             | 5                                     | 1                                             |
| miR-128-3p                                            | 5                                     | 1                                             |
| miR-24-3p                                             | 4                                     | 1                                             |
| miR-194-5p                                            | 3                                     | 1                                             |
| miR-221-3p                                            | 3                                     | 1                                             |
| miR-93-5p                                             | 3                                     | 1                                             |
| miR-212-3p                                            | 2                                     | 1                                             |
| miR-302c-3p                                           | 2                                     | 1                                             |
| miR-425-5p                                            | 2                                     | 1                                             |
| miR-204-5p                                            | 2                                     | 1                                             |
| miR-132-3p                                            | 2                                     | 1                                             |
| miR-7-5p                                              | 1                                     | 1                                             |
| miR-216a-5p                                           | 1                                     | 1                                             |
| miR-203a-3p                                           | 17                                    | 0                                             |
| miR-181-5p                                            | 11                                    | 0                                             |
| miR-101-3p                                            | 10                                    | 0                                             |
| miR-19-3p                                             | 9                                     | 0                                             |
| miR-23-3p                                             | 9                                     | 0                                             |
| miR-499a-5p                                           | 8                                     | 0                                             |
| miR-142-5p                                            | 7                                     | 0                                             |
| miR-200bc-3p                                          | 7                                     | 0                                             |
| miR-25-3p                                             | 7                                     | 0                                             |
| miR-27-3p                                             | 7                                     | 0                                             |
| miR-32-5p                                             | 7                                     | 0                                             |
| miR-367-3p                                            | 7                                     | 0                                             |
| miR-520-3p                                            | 7                                     | 0                                             |
| miR-92-3p                                             | 7                                     | 0                                             |
| miR-9-5p                                              | 7                                     | 0                                             |
| miR-1271-5p                                           | 6                                     | 0                                             |
| miR-137                                               | 6                                     | 0                                             |
| miR-15-5p                                             | 6                                     | 0                                             |
| miR-182-5p                                            | 6                                     | 0                                             |
| miR-183-5p                                            | 6                                     | 0                                             |
| miR-195-5p                                            | 6                                     | 0                                             |
| miR-218-5p                                            | 6                                     | 0                                             |
| miR-26-5p                                             | 6                                     | 0                                             |
| miR-424-5p                                            | 6                                     | 0                                             |
| miR-96-5p                                             | 6                                     | 0                                             |
| miR-29-3p                                             | 5                                     | 0                                             |
| miR-302-3p                                            | 5                                     | 0                                             |
| miR-30-5p                                             | 5                                     | 0                                             |
| miR-372-3p                                            | 5                                     | 0                                             |
| miR-373-3p                                            | 5                                     | 0                                             |

**Table S2.** Selected miRNAs for gene expression analysis.

| miRBase ID      | miRBase Accession | Mature miRNA sequence      | GeneGlobe ID |
|-----------------|-------------------|----------------------------|--------------|
| hsa-miR-1-3p    | MIMAT0022838      | 5'AUAUACAGGGGAGACUCUUAU    | YP02103158   |
| hsa-miR-363-3p  | MIMAT0000707      | 5'AAUUGCACGGUAUCCAUCUGUA   | YP00204726   |
| hsa-miR-124-3p  | MIMAT0000422      | 5'UAAGGCACGCGGUGAAUGCC     | YP00206026   |
| hsa-miR-16-5p   | MIMAT0000069      | 5'UAGCAGCACGUAAAUAUUGGCG   | YP00205702   |
| hsa-miR-497-5p  | MIMAT0002820      | 5'CAGCAGCACACUGUGGUUUGU    | YP00204354   |
| hsa-miR-21-5p   | MIMAT0000076      | 5'UAGCUUAUCAGACUGAUGUUGA   | YP00204230   |
| hsa-miR-128-3p  | MIMAT0000424      | 5'UCACAGUGAACCGGUCUCUUU    | YP00205995   |
| hsa-miR-24-3p   | MIMAT0000080      | 5'UGGCUAGUUCAGCAGGAACAG    | YP00204260   |
| hsa-miR-194-5p  | MIMAT0000460      | 5'UGUAACAGCAACUCCAUGUGGA   | YP00204080   |
| hsa-miR-221-3p  | MIMAT0000278      | 5'AGCUACAUUGUCUGCGGGUUUC   | YP00204532   |
| hsa-miR-93-5p   | MIMAT0000093      | 5'CAAAGUGCUGUUCGUGCAGGUAG  | YP00204715   |
| hsa-miR-212-3p  | MIMAT0000269      | 5'UACAGUCUCCAGUCACGGCC     | YP00204170   |
| hsa-miR-302c-3p | MIMAT0000717      | 5'UAAGUGCUUCCAUGUUUUCAGUGG | YP00204403   |
| hsa-miR-425-5p  | MIMAT0003393      | 5'AAUGACACGAUCACUCCGUUGA   | YP00204337   |
| hsa-miR-204-5p  | MIMAT0000265      | 5'UUCUUUGUGAUCCUAUGCCU     | YP00206072   |
| hsa-miR-132-3p  | MIMAT0000426      | 5'UACAGUCUACAGCCAUGGUCG    | YP00206035   |
| hsa-miR-7-5p    | MIMAT0000252      | 5'UGGAAGACUAGUGAUUUUGUUGU  | YP00205877   |
| hsa-miR-216a-5p | MIMAT0000273      | 5'UAAUCUCAGCUGGCAACUGUGA   | YP00204167   |
| hsa-miR-203a-3p | MIMAT0000264      | 5'GUGAAAUGUUUAGGACCACUAG   | YP00205914   |
| hsa-miR-101-3p  | MIMAT0000099      | 5'UACAGUACUGUGAUAAACUGAA   | YP00204786   |
| hsa-miR-499a-5p | MIMAT0002870      | 5'UUAAGACUUGCAGUGAUGUUU    | YP00205935   |
| hsa-miR-142-5p  | MIMAT0000433      | 5'CAUAAAGUAGAAAGCACUACU    | YP00204722   |
| hsa-miR-25-3p   | MIMAT0000081      | 5'CAUUGCACUUGUCUCGGUCUGA   | YP00204361   |
| hsa-miR-32-5p   | MIMAT0000090      | 5'UAUUGCACAUAACUAAGUUGCA   | YP00204792   |
| hsa-miR-367-3p  | MIMAT0000719      | 5'AAUUGCACUUUAGCAAUGGUGA   | YP00204784   |
| hsa-miR-9-5p    | MIMAT0000441      | 5'UCUUUGGUUAUCUAGCUGUAUGA  | YP00204513   |
| hsa-miR-1271-5p | MIMAT0005796      | 5'CUUGGCACCUAGCAAGCACUCA   | YP00204351   |
| hsa-miR-137     | MIMAT0000429      | 5'UUAUUGCUUAAGAAUACGCGUAG  | YP00206062   |
| hsa-miR-182-5p  | MIMAT0000259      | 5'UUUGGCAAUGGUAGAACUCACACU | YP00206070   |
| hsa-miR-183-5p  | MIMAT0000261      | 5'UAUGGCACUGGUAGAAUUCACU   | YP00206030   |
| hsa-miR-195-5p  | MIMAT0000461      | 5'UAGCAGCACAGAAUAUUGGC     | YP00205869   |
| hsa-miR-218-5p  | MIMAT0000275      | 5'UUGUGCUUGAUCUAACCAUGU    | YP00206034   |
| hsa-miR-26-5p   | MIMAT0000082      | 5'UUCAAGUAAUCCAGGAUAGGCU   | YP00206023   |
| hsa-miR-424-5p  | MIMAT0001341      | 5'CAGCAGCAAUUCAGUUUUUGAA   | YP00204736   |
| hsa-miR-96-5p   | MIMAT0000095      | 5'UUUGGCACUAGCACAUUUUUGCU  | YP00204417   |
| hsa-miR-372-3p  | MIMAT0000724      | 5'AAAGUGCUGCGACAUUUGAGCG   | YP00204137   |
| hsa-miR-373-3p  | MIMAT0000726      | 5'GAAGUGCUUCGAUUUUUGGGUGU  | YP00204604   |

**Table S3.** TaqMan assays used for gene expression analysis with qPCR.

| <b>TaqMan Gene expresison assay</b> | <b>Assay ID</b> |
|-------------------------------------|-----------------|
| TaqMan Assays (WNT2B)               | Hs00921614_m1   |
| TaqMan Assays (TIMP3)               | Hs00165949_m1   |
| TaqMan Assays (PI15)                | Hs00210658_m1   |
| TaqMan Assays (SOX5)                | Hs01552788_g1   |
| TaqMan Assays (MME)                 | Hs00153510_m1   |
| TaqMan Assays (DKK2)                | Hs00205294_m1   |
| TaqMan Assays (TNC)                 | Hs01115665_m1   |
| TaqMan Assays (LIPG)                | Hs00195812_m1   |
| TaqMan Assays (MT1G)                | Hs04401199_s1   |
| TaqMan Assays (DDX3Y)               | Hs00965254_gH   |
| TaqMan Assays (SLC2A3)              | Hs00359840_m1   |
| TaqMan Assays (TBP)                 | Hs00427620_m1   |
| TaqMan Assays (RPLP0)               | Hs00420895_gH   |
| TaqMan Assays (GAPDH)               | Hs02786624_g1   |
